# Supplementary material for: Potentiometric sensing utilizing paper-based microfluidic sampling
Source: Royal Society of Chemistry journal article supplement (doi:10.1039/c3an02157b), 2014-01-01
Supplement: c3an02157b1.pdf [file c3an02157b1.pdf]

## Potentiometric sensing utilizing paper-based microfluidic sampling

Jingwen Cui<sup>a</sup>, Grzegorz Lisak<sup>a</sup>, Sylwia Strzalkowska<sup>b</sup>, Johan Bobacka<sup>a</sup> \*

<sup>a</sup> Åbo Akademi University, Process Chemistry Centre, c/o Laboratory of Analytical Chemistry, Biskopsgatan 8, FIN-20500 Åbo-Turku, Finland

<sup>b</sup> University of Warsaw, Department of Chemistry, Pasteura 1, 02-093 Warsaw, Poland

\* Corresponding author: johan.bobacka@abo.fi

### Electronic supplementary information

## 1. Experimental

### 1.1. Materials

Poly(vinyl chloride) (PVC) of high molecular weight, potassium tetrakis[3,5-bis(trifluoromethyl)phenyl]-borate (KTFPB), 2-nitrophenyl octyl ether (o-NPOE,  $\geq 99\%$ ), tetrahydrofuran (THF,  $\geq 99.5\%$ ), tetrabutylammonium tetrabutylborate (TBA-TBB, 97 %) and bis(2-ethylhexyl) sebacate (DOS,  $\geq 97\%$ ) were obtained from Fluka. Potassium chloride (KCl, purity  $\geq 99\%$ ), ethanol, KOH and HNO<sub>3</sub> were obtained from J.T Baker, while 3,4-ethylenedioxythiophene (EDOT,  $> 97\%$ ) was obtained from Bayer AG. Deionized water was obtained with an ELGA Purelab Ultra system (resistivity = 18 M $\Omega$  cm). Black ribbon filter paper (pore size = 12–25  $\mu\text{m}$ ) and Blue ribbon filter paper (pore size = 2  $\mu\text{m}$ ) were purchased from Schleicher&Schuell GmbH., while White ribbon filter paper (pore size = 4–12  $\mu\text{m}$ ) was purchased from Whatman GmbH.

## 1.2. Electrode fabrication

Glassy carbon (GC) disk electrodes with a diameter of 3 mm were polished using 1  $\mu\text{m}$  diamond paste and 0.3  $\mu\text{m}$   $\text{Al}_2\text{O}_3$ . After polishing, the GC electrodes were immersed in 1 M  $\text{HNO}_3$ , in 0.1 M KOH, and in ethanol for further cleaning. Finally, the electrodes were placed in an ultrasonic bath with deionized water for 10 minutes. Poly(3,4-ethylenedioxythiophene) (PEDOT) was electrodeposited on the GC disk, working electrodes from a deaerated aqueous solution containing 0.01 M EDOT and 0.1 M KCl by applying a constant current of 0.014 mA ( $0.2 \text{ mA cm}^{-2}$ ) for 714 s.<sup>26</sup> The auxiliary electrode was a GC rod and the reference electrode was a Ag/AgCl/3 M KCl//1 M LiAc (lithium acetate). After electropolymerization, a potassium ( $\text{K}^+$ ) ion-selective membrane (ISM) was drop casted on the GC/PEDOT( $\text{Cl}^-$ ) electrodes, resulting in solid-contact  $\text{K}^+$ -selective ISEs ( $\text{K}^+$ -ISEs). The ISM cocktail contained 1.0 % valinomycin, 0.5 % KTFPB, 65.2 % DOS, and 33.3 % PVC (dissolved in THF at a dry mass of 15 % w/w).<sup>26</sup> Analogously, the solid-contact reference electrode (SC-RE) was prepared by drop casting a reference membrane cocktail containing 12.5 % TBA-TBB, 58.3 % o-NPOE and 29.2 % PVC (dissolved in THF at a dry mass of 15 % w/w) on another GC/PEDOT( $\text{Cl}^-$ ) electrode.<sup>23</sup>

## 1.3. Potentiometric measurements

Potentiometric measurements were performed using an EMF16 Interface (Lawson Labs Inc., USA). Before the measurements utilizing paper-based sampling, the Nernstian response of the  $\text{K}^+$ -ISEs versus the SC-RE was verified in a conventional potentiometric cell by immersing the electrodes directly into the bulk solution ( $10^{-1}$ – $10^{-3}$  M KCl). After a Nernstian response was observed, filter paper-based microfluidic sampling was investigated.

Three ashless types of filter papers with different porosity and pore sizes (Black Ribbon = T1, White Ribbon = T2, and Blue Ribbon = T3) were used during the potentiometric

measurement as paper substrates to absorb and hold micro volumes of sample solutions. To optimize the measurement conditions, four shapes/sizes of filter papers were investigated, as illustrated in Fig. S1.

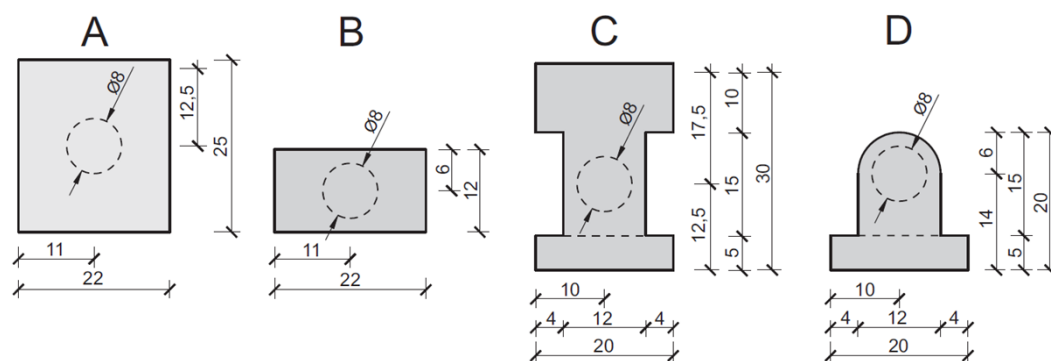

**Fig. S1.** Illustrations A, B, C and D show the shapes and dimensions (in mm) of filter papers used as microfluidic sampling media for potentiometric sensing. The dashed circles indicate the position where the K<sup>+</sup>-ISE and SC-RE were positioned against the paper from opposite sides.
